# Supplementary material for: Temporal GeneTerrain: advancing precision medicine through dynamic gene expression visualization
Source: Front Bioinform. 2025 Jun 18;5:1602850. doi: 10.3389/fbinf.2025.1602850 (PMC12213653; doi:10.3389/fbinf.2025.1602850)
Supplement: Supplementary file 1 [file Table2.xlsx]

## Sheet: Downregulated_Pathway_TM_time
PAG ID	Type	Name	Size	Species	Data source	Overlap	Similarity score	CoCo score	p-value	FDR	Time
WAG002380	P	Nuclear receptors meta pathway	318	Homo sapiens	WikiPathway_2021	40	0.05	566	2.23e-21	9.8e-20	0h
WAG003219	P	Orexin receptor pathway	156	Homo sapiens	WikiPathway_2021	27	0.06	370	1.83e-18	7.86e-17	0h
WAG002190	P	Spinal cord injury	121	Homo sapiens	WikiPathway_2021	20	0.05	912	1.17e-13	4.93e-12	0h
WAG002378	P	Glucocorticoid receptor pathway	71	Homo sapiens	WikiPathway_2021	14	0.05	26.5	4.73e-11	1.94e-09	0h
WAG003134	P	NGF stimulated transcription	39	Homo sapiens	WikiPathway_2021	10	0.06	569	1.82e-09	7.27e-08	0h
WAG003213	P	Prostaglandin signaling	33	Homo sapiens	WikiPathway_2021	9	0.06	1720	6.55e-09	2.55e-07	0h
WAG003257	P	Hypertrophy model	20	Homo sapiens	WikiPathway_2021	7	0.08	131	4.71e-08	1.79e-06	0h
WAG002936	P	LTF danger signal response pathway	19	Homo sapiens	WikiPathway_2021	6	0.07	2300	8.89e-07	3.29e-05	0h
WAG003044	P	FGF23 signaling in hypophosphatemic rickets and related disorders	22	Homo sapiens	WikiPathway_2021	6	0.06	546	2.31e-06	8.32e-05	0h
WAG003098	P	Unfolded protein response	25	Homo sapiens	WikiPathway_2021	6	0.05	925	5.18e-06	0.000181	0h
WAG002734	P	Regulation of TLR by endogenous ligand	16	Homo sapiens	WikiPathway_2021	5	0.07	731	7.99e-06	0.000272	0h
WAG002534	P	Photodynamic therapy induced unfolded protein response	27	Homo sapiens	WikiPathway_2021	6	0.05	899	8.34e-06	0.000275	0h
WAG003288	P	Benzo(a)pyrene metabolism	9	Homo sapiens	WikiPathway_2021	4	0.09	413	1.39e-05	0.000444	0h
WAG002873	P	ncRNAs involved in STAT3 signaling in hepatocellular carcinoma	18	Homo sapiens	WikiPathway_2021	5	0.06	774	1.51e-05	0.000453	0h
WAG002625	P	MYD88 distinct input output pathway	18	Homo sapiens	WikiPathway_2021	5	0.06	2870	1.51e-05	0.000468	0h
WAG002020	P	TP53 network	19	Homo sapiens	WikiPathway_2021	5	0.06	2290	2.01e-05	0.000583	0h
WAG002668	P	Robo4 and VEGF signaling pathways crosstalk	6	Homo sapiens	WikiPathway_2021	3	0.1	417	0.000123	0.00344	0h
WAG003083	P	COVID 19 adverse outcome pathway	15	Homo sapiens	WikiPathway_2021	4	0.06	1870	0.000134	0.00349	0h
WAG002405	P	let 7 inhibition of ES cell reprogramming	15	Homo sapiens	WikiPathway_2021	4	0.06	22.8	0.000134	0.00363	0h
WAG002662	P	Leptin insulin signaling overlap	17	Homo sapiens	WikiPathway_2021	4	0.05	2980	0.000226	0.00541	0h
WAG002477	P	NOTCH1 regulation of endothelial cell calcification	17	Homo sapiens	WikiPathway_2021	4	0.05	340	0.000226	0.00564	0h
WAG003086	P	LDLRAD4 and what we know about it	8	Homo sapiens	WikiPathway_2021	3	0.08	97.8	0.000331	0.00762	0h
WAG002795	P	Macrophage markers	9	Homo sapiens	WikiPathway_2021	3	0.07	374	0.000488	0.0102	0h
WAG002521	P	MicroRNA for targeting cancer growth and vascularization in glioblastoma	9	Homo sapiens	WikiPathway_2021	3	0.07	223	0.000488	0.0107	0h
WAG002842	P	Ethanol metabolism production of ROS by CYP2E1	10	Homo sapiens	WikiPathway_2021	3	0.06	436	0.000684	0.0137	0h
WAG002959	P	Alternative pathway of fetal androgen synthesis	11	Homo sapiens	WikiPathway_2021	3	0.06	522	0.000923	0.0166	0h
WAG002591	P	Metallothioneins bind metals	11	Homo sapiens	WikiPathway_2021	3	0.06	1420	0.000923	0.0175	0h
WAG003213	P	Prostaglandin signaling	33	Homo sapiens	WikiPathway_2021	9	0.06	1720	2.16e-09	6.04e-08	3h
WAG003257	P	Hypertrophy model	20	Homo sapiens	WikiPathway_2021	7	0.08	131	1.96e-08	5.3e-07	3h
WAG002936	P	LTF danger signal response pathway	19	Homo sapiens	WikiPathway_2021	6	0.07	2300	4.21e-07	1.1e-05	3h
WAG003044	P	FGF23 signaling in hypophosphatemic rickets and related disorders	22	Homo sapiens	WikiPathway_2021	6	0.06	546	1.1e-06	2.76e-05	3h
WAG003288	P	Benzo(a)pyrene metabolism	9	Homo sapiens	WikiPathway_2021	4	0.09	413	8.37e-06	0.000184	3h
WAG002873	P	ncRNAs involved in STAT3 signaling in hepatocellular carcinoma	18	Homo sapiens	WikiPathway_2021	5	0.06	774	8.16e-06	0.000188	3h
WAG002625	P	MYD88 distinct input output pathway	18	Homo sapiens	WikiPathway_2021	5	0.06	2870	8.16e-06	0.000196	3h
WAG002668	P	Robo4 and VEGF signaling pathways crosstalk	6	Homo sapiens	WikiPathway_2021	3	0.1	417	8.4e-05	0.00168	3h
WAG003083	P	COVID 19 adverse outcome pathway	15	Homo sapiens	WikiPathway_2021	4	0.06	1870	8.22e-05	0.00173	3h
WAG002734	P	Regulation of TLR by endogenous ligand	16	Homo sapiens	WikiPathway_2021	4	0.05	731	0.000108	0.00205	3h
WAG002477	P	NOTCH1 regulation of endothelial cell calcification	17	Homo sapiens	WikiPathway_2021	4	0.05	340	0.000139	0.0025	3h
WAG003086	P	LDLRAD4 and what we know about it	8	Homo sapiens	WikiPathway_2021	3	0.08	97.8	0.000228	0.00387	3h
WAG002521	P	MicroRNA for targeting cancer growth and vascularization in glioblastoma	9	Homo sapiens	WikiPathway_2021	3	0.07	223	0.000336	0.00537	3h
WAG002959	P	Alternative pathway of fetal androgen synthesis	11	Homo sapiens	WikiPathway_2021	3	0.06	522	0.000638	0.00957	3h
WAG002701	P	Selective serotonin reuptake inhibitors lead to several adverse outcomes	6	Homo sapiens	WikiPathway_2021	2	0.07	245	0.00378	0.0492	3h
WAG003213	P	Prostaglandin signaling	33	Homo sapiens	WikiPathway_2021	9	0.07	1720	9.57e-10	2.3e-08	6h
WAG003257	P	Hypertrophy model	20	Homo sapiens	WikiPathway_2021	7	0.08	131	1.04e-08	2.38e-07	6h
WAG002936	P	LTF danger signal response pathway	19	Homo sapiens	WikiPathway_2021	6	0.07	2300	2.44e-07	5.38e-06	6h
WAG003044	P	FGF23 signaling in hypophosphatemic rickets and related disorders	22	Homo sapiens	WikiPathway_2021	6	0.06	546	6.43e-07	1.35e-05	6h
WAG002625	P	MYD88 distinct input output pathway	18	Homo sapiens	WikiPathway_2021	5	0.06	2870	5.2e-06	0.000104	6h
WAG003083	P	COVID 19 adverse outcome pathway	15	Homo sapiens	WikiPathway_2021	4	0.06	1870	5.74e-05	0.00109	6h
WAG002668	P	Robo4 and VEGF signaling pathways crosstalk	6	Homo sapiens	WikiPathway_2021	3	0.1	417	6.37e-05	0.00115	6h
WAG002734	P	Regulation of TLR by endogenous ligand	16	Homo sapiens	WikiPathway_2021	4	0.05	731	7.54e-05	0.00128	6h
WAG002477	P	NOTCH1 regulation of endothelial cell calcification	17	Homo sapiens	WikiPathway_2021	4	0.05	340	9.71e-05	0.00155	6h
WAG003086	P	LDLRAD4 and what we know about it	8	Homo sapiens	WikiPathway_2021	3	0.08	97.8	0.000173	0.0026	6h
WAG003288	P	Benzo(a)pyrene metabolism	9	Homo sapiens	WikiPathway_2021	3	0.07	413	0.000256	0.00358	6h
WAG002959	P	Alternative pathway of fetal androgen synthesis	11	Homo sapiens	WikiPathway_2021	3	0.06	522	0.000487	0.00634	6h
WAG002701	P	Selective serotonin reuptake inhibitors lead to several adverse outcomes	6	Homo sapiens	WikiPathway_2021	2	0.07	245	0.00315	0.0379	6h
WAG003077	P	Activation of NLRP3 inflammasome by SARS CoV 2	7	Homo sapiens	WikiPathway_2021	2	0.06	672	0.00435	0.0479	6h
WAG003213	P	Prostaglandin signaling	33	Homo sapiens	WikiPathway_2021	9	0.07	1720	6.66e-10	1.47e-08	9h
WAG003257	P	Hypertrophy model	20	Homo sapiens	WikiPathway_2021	7	0.08	131	7.79e-09	1.64e-07	9h
WAG002936	P	LTF danger signal response pathway	19	Homo sapiens	WikiPathway_2021	6	0.07	2300	1.92e-07	3.84e-06	9h
WAG003044	P	FGF23 signaling in hypophosphatemic rickets and related disorders	22	Homo sapiens	WikiPathway_2021	6	0.06	546	5.05e-07	9.6e-06	9h
WAG002625	P	MYD88 distinct input output pathway	18	Homo sapiens	WikiPathway_2021	5	0.06	2870	4.25e-06	7.66e-05	9h
WAG003083	P	COVID 19 adverse outcome pathway	15	Homo sapiens	WikiPathway_2021	4	0.06	1870	4.89e-05	0.000831	9h
WAG002668	P	Robo4 and VEGF signaling pathways crosstalk	6	Homo sapiens	WikiPathway_2021	3	0.1	417	5.63e-05	0.000901	9h
WAG003086	P	LDLRAD4 and what we know about it	8	Homo sapiens	WikiPathway_2021	3	0.08	97.8	0.000153	0.0023	9h
WAG003288	P	Benzo(a)pyrene metabolism	9	Homo sapiens	WikiPathway_2021	3	0.07	413	0.000226	0.00317	9h
WAG002959	P	Alternative pathway of fetal androgen synthesis	11	Homo sapiens	WikiPathway_2021	3	0.06	522	0.000432	0.00562	9h
WAG002701	P	Selective serotonin reuptake inhibitors lead to several adverse outcomes	6	Homo sapiens	WikiPathway_2021	2	0.07	245	0.00291	0.0349	9h
WAG003077	P	Activation of NLRP3 inflammasome by SARS CoV 2	7	Homo sapiens	WikiPathway_2021	2	0.06	672	0.00402	0.0442	9h
WAG003213	P	Prostaglandin signaling	33	Homo sapiens	WikiPathway_2021	9	0.07	1720	2.4e-10	5.53e-09	12h
WAG002936	P	LTF danger signal response pathway	19	Homo sapiens	WikiPathway_2021	6	0.07	2300	9.69e-08	2.13e-06	12h
WAG003257	P	Hypertrophy model	20	Homo sapiens	WikiPathway_2021	6	0.07	131	1.37e-07	2.87e-06	12h
WAG002625	P	MYD88 distinct input output pathway	18	Homo sapiens	WikiPathway_2021	5	0.06	2870	2.42e-06	4.83e-05	12h
WAG002533	P	Photodynamic therapy induced NFE2L2 (NRF2) survival signaling	23	Homo sapiens	WikiPathway_2021	5	0.05	847	8.91e-06	0.000169	12h
WAG003083	P	COVID 19 adverse outcome pathway	15	Homo sapiens	WikiPathway_2021	4	0.06	1870	3.12e-05	0.000561	12h
WAG002668	P	Robo4 and VEGF signaling pathways crosstalk	6	Homo sapiens	WikiPathway_2021	3	0.1	417	3.98e-05	0.000677	12h
WAG003288	P	Benzo(a)pyrene metabolism	9	Homo sapiens	WikiPathway_2021	3	0.07	413	0.000161	0.00258	12h
WAG002959	P	Alternative pathway of fetal androgen synthesis	11	Homo sapiens	WikiPathway_2021	3	0.06	522	0.000308	0.00462	12h
WAG002379	P	Estrogen receptor pathway	13	Homo sapiens	WikiPathway_2021	3	0.05	446	0.000521	0.00729	12h
WAG002701	P	Selective serotonin reuptake inhibitors lead to several adverse outcomes	6	Homo sapiens	WikiPathway_2021	2	0.07	245	0.00232	0.0301	12h
WAG003077	P	Activation of NLRP3 inflammasome by SARS CoV 2	7	Homo sapiens	WikiPathway_2021	2	0.06	672	0.0032	0.0384	12h
WAG003086	P	LDLRAD4 and what we know about it	8	Homo sapiens	WikiPathway_2021	2	0.05	97.8	0.00422	0.0422	12h
WAG002056	P	Interleukin 1 processing	8	Homo sapiens	WikiPathway_2021	2	0.05	990	0.00422	0.0464	12h
WAG002707	P	Intestinal absorption	4	Homo sapiens	WikiPathway_2021	1	0.05	226	0.0491	0.0491	12h
WAG002936	P	LTF danger signal response pathway	19	Homo sapiens	WikiPathway_2021	4	0.05	2300	1.38e-05	0.000111	24h
WAG002959	P	Alternative pathway of fetal androgen synthesis	11	Homo sapiens	WikiPathway_2021	3	0.06	522	7.85e-05	0.00055	24h
WAG002668	P	Robo4 and VEGF signaling pathways crosstalk	6	Homo sapiens	WikiPathway_2021	2	0.07	417	0.000927	0.00556	24h
WAG003077	P	Activation of NLRP3 inflammasome by SARS CoV 2	7	Homo sapiens	WikiPathway_2021	2	0.06	672	0.00129	0.00643	24h
WAG002707	P	Intestinal absorption	4	Homo sapiens	WikiPathway_2021	1	0.05	226	0.0312	0.0312	24h
WAG002389	P	Hypoxia mediated EMT and stemness	2	Homo sapiens	WikiPathway_2021	1	0.1	0	0.0159	0.0476	24h

## Sheet: Upregulated_Pathway_TM_time
PAG ID	Type	Name	Size	Species	Data source	Overlap	Similarity score	CoCo score	p-value	FDR	Time
WAG002591	P	Metallothioneins bind metals	11	Homo sapiens	WikiPathway_2021	3	0.07	1420	8.91e-06	4.45e-05	0h
WAG002750	P	Choline catabolism	6	Homo sapiens	WikiPathway_2021	2	0.08	245	0.000217	0.000867	0h
WAG002016	P	Nicotine effect on chromaffin cells	4	Homo sapiens	WikiPathway_2021	1	0.05	79.8	0.0152	0.0152	0h
WAG002476	P	Evolocumab mechanism to reduce LDL cholesterol	2	Homo sapiens	WikiPathway_2021	1	0.1	126	0.00765	0.0153	0h
WAG002357	P	PCSK9 mediated LDL receptor degradation	2	Homo sapiens	WikiPathway_2021	1	0.1	126	0.00765	0.023	0h
WAG003134	P	NGF stimulated transcription	39	Homo sapiens	WikiPathway_2021	9	0.07	569	1.81E-12	1.63E-11	3h
WAG002591	P	Metallothioneins bind metals	11	Homo sapiens	WikiPathway_2021	4	0.08	1420	4.28E-07	3.43e-06	3h
WAG002534	P	Photodynamic therapy induced unfolded protein response	27	Homo sapiens	WikiPathway_2021	5	0.05	899	5.76E-07	4.03e-06	3h
WAG003130	P	Response of EIF2AK1 (HRI) to heme deficiency	15	Homo sapiens	WikiPathway_2021	4	0.06	532	1.73e-06	1.04e-05	3h
WAG002750	P	Choline catabolism	6	Homo sapiens	WikiPathway_2021	2	0.07	245	0.000543	0.00271	3h
WAG002228	P	Aripiprazole metabolic pathway	4	Homo sapiens	WikiPathway_2021	1	0.05	35.8	0.024	0.024	3h
WAG002476	P	Evolocumab mechanism to reduce LDL cholesterol	2	Homo sapiens	WikiPathway_2021	1	0.1	126	0.0121	0.0364	3h
WAG002016	P	Nicotine effect on chromaffin cells	4	Homo sapiens	WikiPathway_2021	1	0.05	79.8	0.024	0.0479	3h
WAG002357	P	PCSK9 mediated LDL receptor degradation	2	Homo sapiens	WikiPathway_2021	1	0.1	126	0.0121	0.0485	3h
WAG003134	P	NGF stimulated transcription	39	Homo sapiens	WikiPathway_2021	10	0.07	569	2.77E-13	2.77E-12	6h
WAG002534	P	Photodynamic therapy induced unfolded protein response	27	Homo sapiens	WikiPathway_2021	6	0.06	899	4.55E-08	4.09e-07	6h
WAG003130	P	Response of EIF2AK1 (HRI) to heme deficiency	15	Homo sapiens	WikiPathway_2021	5	0.08	532	6.72E-08	5.37e-07	6h
WAG002591	P	Metallothioneins bind metals	11	Homo sapiens	WikiPathway_2021	4	0.08	1420	1.01e-06	7.06e-06	6h
WAG002750	P	Choline catabolism	6	Homo sapiens	WikiPathway_2021	2	0.07	245	0.000831	0.00499	6h
WAG003284	P	Polyol pathway	4	Homo sapiens	WikiPathway_2021	1	0.05	130	0.0296	0.0296	6h
WAG003134	P	NGF stimulated transcription	39	Homo sapiens	WikiPathway_2021	10	0.07	569	5.96E-13	5.96E-12	9h
WAG002534	P	Photodynamic therapy induced unfolded protein response	27	Homo sapiens	WikiPathway_2021	6	0.06	899	7.17E-08	6.45e-07	9h
WAG003130	P	Response of EIF2AK1 (HRI) to heme deficiency	15	Homo sapiens	WikiPathway_2021	5	0.08	532	9.86E-08	7.88e-07	9h
WAG002591	P	Metallothioneins bind metals	11	Homo sapiens	WikiPathway_2021	4	0.08	1420	1.37e-06	9.6e-06	9h
WAG002750	P	Choline catabolism	6	Homo sapiens	WikiPathway_2021	2	0.07	245	0.000968	0.00581	9h
WAG003284	P	Polyol pathway	4	Homo sapiens	WikiPathway_2021	1	0.05	130	0.0319	0.0319	9h
WAG003219	P	Orexin receptor pathway	156	Homo sapiens	WikiPathway_2021	22	0.06	370	3.27E-19	4.57E-18	12h
WAG003134	P	NGF stimulated transcription	39	Homo sapiens	WikiPathway_2021	12	0.08	569	1.94E-15	2.52E-14	12h
WAG002534	P	Photodynamic therapy induced unfolded protein response	27	Homo sapiens	WikiPathway_2021	6	0.06	899	2.02e-07	2.42e-06	12h
WAG003130	P	Response of EIF2AK1 (HRI) to heme deficiency	15	Homo sapiens	WikiPathway_2021	5	0.08	532	2.36e-07	2.59e-06	12h
WAG002591	P	Metallothioneins bind metals	11	Homo sapiens	WikiPathway_2021	4	0.08	1420	2.76e-06	2.76e-05	12h
WAG002405	P	let 7 inhibition of ES cell reprogramming	15	Homo sapiens	WikiPathway_2021	4	0.06	22.8	1.1e-05	9.88e-05	12h
WAG002873	P	ncRNAs involved in STAT3 signaling in hepatocellular carcinoma	18	Homo sapiens	WikiPathway_2021	4	0.05	774	2.39e-05	0.000191	12h
WAG002524	P	miR 517 relationship with ARCN1 and USP1	5	Homo sapiens	WikiPathway_2021	2	0.08	87.4	0.000923	0.00646	12h
WAG002750	P	Choline catabolism	6	Homo sapiens	WikiPathway_2021	2	0.07	245	0.00137	0.00822	12h
WAG003284	P	Polyol pathway	4	Homo sapiens	WikiPathway_2021	1	0.05	130	0.0379	0.0379	12h
WAG003219	P	Orexin receptor pathway	156	Homo sapiens	WikiPathway_2021	26	0.06	370	4.57E-20	1.1E-18	24h
WAG003134	P	NGF stimulated transcription	39	Homo sapiens	WikiPathway_2021	12	0.08	569	2.12E-13	4.87E-12	24h
WAG002487	P	Zinc homeostasis	37	Homo sapiens	WikiPathway_2021	8	0.05	352	4.82E-08	1.06e-06	24h
WAG003130	P	Response of EIF2AK1 (HRI) to heme deficiency	15	Homo sapiens	WikiPathway_2021	5	0.07	532	1.65e-06	3.47e-05	24h
WAG002534	P	Photodynamic therapy induced unfolded protein response	27	Homo sapiens	WikiPathway_2021	6	0.05	899	2e-06	4.01e-05	24h
WAG003257	P	Hypertrophy model	20	Homo sapiens	WikiPathway_2021	5	0.06	131	7.94e-06	0.000151	24h
WAG002591	P	Metallothioneins bind metals	11	Homo sapiens	WikiPathway_2021	4	0.08	1420	1.31e-05	0.000224	24h
WAG003044	P	FGF23 signaling in hypophosphatemic rickets and related disorders	22	Homo sapiens	WikiPathway_2021	5	0.05	546	1.31e-05	0.000236	24h
WAG002405	P	let 7 inhibition of ES cell reprogramming	15	Homo sapiens	WikiPathway_2021	4	0.06	22.8	5.13e-05	0.000821	24h
WAG002842	P	Ethanol metabolism production of ROS by CYP2E1	10	Homo sapiens	WikiPathway_2021	3	0.06	436	0.000331	0.00496	24h
WAG002559	P	lncRNA mediated mechanisms of therapeutic resistance	12	Homo sapiens	WikiPathway_2021	3	0.05	128	0.000589	0.00824	24h
WAG002524	P	miR 517 relationship with ARCN1 and USP1	5	Homo sapiens	WikiPathway_2021	2	0.08	87.4	0.00202	0.0262	24h
WAG002750	P	Choline catabolism	6	Homo sapiens	WikiPathway_2021	2	0.07	245	0.00298	0.0358	24h

## Sheet: Pathway_activation_status
PAG ID	Name	Time	Status
WAG002959	Alternative pathway of fetal androgen synthesis	0h	Non-Activated
WAG003288	Benzo(a)pyrene metabolism	0h	Non-Activated
WAG003083	COVID 19 adverse outcome pathway	0h	Non-Activated
WAG002750	Choline catabolism	0h	Active
WAG002842	Ethanol metabolism production of ROS by CYP2E1	0h	Non-Activated
WAG002476	Evolocumab mechanism to reduce LDL cholesterol	0h	Active
WAG003044	FGF23 signaling in hypophosphatemic rickets and related disorders	0h	Non-Activated
WAG002378	Glucocorticoid receptor pathway	0h	Non-Activated
WAG003257	Hypertrophy model	0h	Non-Activated
WAG003086	LDLRAD4 and what we know about it	0h	Non-Activated
WAG002936	LTF danger signal response pathway	0h	Non-Activated
WAG002662	Leptin insulin signaling overlap	0h	Non-Activated
WAG002625	MYD88 distinct input output pathway	0h	Non-Activated
WAG002795	Macrophage markers	0h	Non-Activated
WAG002591	Metallothioneins bind metals	0h	Active
WAG002591	Metallothioneins bind metals	0h	Non-Activated
WAG002521	MicroRNA for targeting cancer growth and vascularization in glioblastoma	0h	Non-Activated
WAG003134	NGF stimulated transcription	0h	Non-Activated
WAG002477	NOTCH1 regulation of endothelial cell calcification	0h	Non-Activated
WAG002016	Nicotine effect on chromaffin cells	0h	Active
WAG002380	Nuclear receptors meta pathway	0h	Non-Activated
WAG003219	Orexin receptor pathway	0h	Non-Activated
WAG002357	PCSK9 mediated LDL receptor degradation	0h	Active
WAG002534	Photodynamic therapy induced unfolded protein response	0h	Non-Activated
WAG003213	Prostaglandin signaling	0h	Non-Activated
WAG002734	Regulation of TLR by endogenous ligand	0h	Non-Activated
WAG002668	Robo4 and VEGF signaling pathways crosstalk	0h	Non-Activated
WAG002190	Spinal cord injury	0h	Non-Activated
WAG002020	TP53 network	0h	Non-Activated
WAG003098	Unfolded protein response	0h	Non-Activated
WAG002405	let 7 inhibition of ES cell reprogramming	0h	Non-Activated
WAG002873	ncRNAs involved in STAT3 signaling in hepatocellular carcinoma	0h	Non-Activated
WAG003077	Activation of NLRP3 inflammasome by SARS CoV 2	12h	Non-Activated
WAG002959	Alternative pathway of fetal androgen synthesis	12h	Non-Activated
WAG003288	Benzo(a)pyrene metabolism	12h	Non-Activated
WAG003083	COVID 19 adverse outcome pathway	12h	Non-Activated
WAG002750	Choline catabolism	12h	Active
WAG002379	Estrogen receptor pathway	12h	Non-Activated
WAG003257	Hypertrophy model	12h	Non-Activated
WAG002056	Interleukin 1 processing	12h	Non-Activated
WAG002707	Intestinal absorption	12h	Non-Activated
WAG003086	LDLRAD4 and what we know about it	12h	Non-Activated
WAG002936	LTF danger signal response pathway	12h	Non-Activated
WAG002625	MYD88 distinct input output pathway	12h	Non-Activated
WAG002591	Metallothioneins bind metals	12h	Active
WAG003134	NGF stimulated transcription	12h	Active
WAG003219	Orexin receptor pathway	12h	Active
WAG002533	Photodynamic therapy induced NFE2L2 (NRF2) survival signaling	12h	Non-Activated
WAG002534	Photodynamic therapy induced unfolded protein response	12h	Active
WAG003284	Polyol pathway	12h	Active
WAG003213	Prostaglandin signaling	12h	Non-Activated
WAG003130	Response of EIF2AK1 (HRI) to heme deficiency	12h	Active
WAG002668	Robo4 and VEGF signaling pathways crosstalk	12h	Non-Activated
WAG002701	Selective serotonin reuptake inhibitors lead to several adverse outcomes	12h	Non-Activated
WAG002405	let 7 inhibition of ES cell reprogramming	12h	Active
WAG002524	miR 517 relationship with ARCN1 and USP1	12h	Active
WAG002873	ncRNAs involved in STAT3 signaling in hepatocellular carcinoma	12h	Active
WAG003077	Activation of NLRP3 inflammasome by SARS CoV 2	24h	Non-Activated
WAG002959	Alternative pathway of fetal androgen synthesis	24h	Non-Activated
WAG002750	Choline catabolism	24h	Active
WAG002842	Ethanol metabolism production of ROS by CYP2E1	24h	Active
WAG003044	FGF23 signaling in hypophosphatemic rickets and related disorders	24h	Active
WAG003257	Hypertrophy model	24h	Active
WAG002389	Hypoxia mediated EMT and stemness	24h	Non-Activated
WAG002707	Intestinal absorption	24h	Non-Activated
WAG002936	LTF danger signal response pathway	24h	Non-Activated
WAG002591	Metallothioneins bind metals	24h	Active
WAG003134	NGF stimulated transcription	24h	Active
WAG003219	Orexin receptor pathway	24h	Active
WAG002534	Photodynamic therapy induced unfolded protein response	24h	Active
WAG003130	Response of EIF2AK1 (HRI) to heme deficiency	24h	Active
WAG002668	Robo4 and VEGF signaling pathways crosstalk	24h	Non-Activated
WAG002487	Zinc homeostasis	24h	Active
WAG002405	let 7 inhibition of ES cell reprogramming	24h	Active
WAG002559	lncRNA mediated mechanisms of therapeutic resistance	24h	Active
WAG002524	miR 517 relationship with ARCN1 and USP1	24h	Active
WAG002959	Alternative pathway of fetal androgen synthesis	3h	Non-Activated
WAG002228	Aripiprazole metabolic pathway	3h	Active
WAG003288	Benzo(a)pyrene metabolism	3h	Non-Activated
WAG003083	COVID 19 adverse outcome pathway	3h	Non-Activated
WAG002750	Choline catabolism	3h	Active
WAG002476	Evolocumab mechanism to reduce LDL cholesterol	3h	Active
WAG003044	FGF23 signaling in hypophosphatemic rickets and related disorders	3h	Non-Activated
WAG003257	Hypertrophy model	3h	Non-Activated
WAG003086	LDLRAD4 and what we know about it	3h	Non-Activated
WAG002936	LTF danger signal response pathway	3h	Non-Activated
WAG002625	MYD88 distinct input output pathway	3h	Non-Activated
WAG002591	Metallothioneins bind metals	3h	Active
WAG002521	MicroRNA for targeting cancer growth and vascularization in glioblastoma	3h	Non-Activated
WAG003134	NGF stimulated transcription	3h	Active
WAG002477	NOTCH1 regulation of endothelial cell calcification	3h	Non-Activated
WAG002016	Nicotine effect on chromaffin cells	3h	Active
WAG002357	PCSK9 mediated LDL receptor degradation	3h	Active
WAG002534	Photodynamic therapy induced unfolded protein response	3h	Active
WAG003213	Prostaglandin signaling	3h	Non-Activated
WAG002734	Regulation of TLR by endogenous ligand	3h	Non-Activated
WAG003130	Response of EIF2AK1 (HRI) to heme deficiency	3h	Active
WAG002668	Robo4 and VEGF signaling pathways crosstalk	3h	Non-Activated
WAG002701	Selective serotonin reuptake inhibitors lead to several adverse outcomes	3h	Non-Activated
WAG002873	ncRNAs involved in STAT3 signaling in hepatocellular carcinoma	3h	Non-Activated
WAG003077	Activation of NLRP3 inflammasome by SARS CoV 2	6h	Non-Activated
WAG002959	Alternative pathway of fetal androgen synthesis	6h	Non-Activated
WAG003288	Benzo(a)pyrene metabolism	6h	Non-Activated
WAG003083	COVID 19 adverse outcome pathway	6h	Non-Activated
WAG002750	Choline catabolism	6h	Active
WAG003044	FGF23 signaling in hypophosphatemic rickets and related disorders	6h	Non-Activated
WAG003257	Hypertrophy model	6h	Non-Activated
WAG003086	LDLRAD4 and what we know about it	6h	Non-Activated
WAG002936	LTF danger signal response pathway	6h	Non-Activated
WAG002625	MYD88 distinct input output pathway	6h	Non-Activated
WAG002591	Metallothioneins bind metals	6h	Active
WAG003134	NGF stimulated transcription	6h	Active
WAG002477	NOTCH1 regulation of endothelial cell calcification	6h	Non-Activated
WAG002534	Photodynamic therapy induced unfolded protein response	6h	Active
WAG003284	Polyol pathway	6h	Active
WAG003213	Prostaglandin signaling	6h	Non-Activated
WAG002734	Regulation of TLR by endogenous ligand	6h	Non-Activated
WAG003130	Response of EIF2AK1 (HRI) to heme deficiency	6h	Active
WAG002668	Robo4 and VEGF signaling pathways crosstalk	6h	Non-Activated
WAG002701	Selective serotonin reuptake inhibitors lead to several adverse outcomes	6h	Non-Activated
WAG003077	Activation of NLRP3 inflammasome by SARS CoV 2	9h	Non-Activated
WAG002959	Alternative pathway of fetal androgen synthesis	9h	Non-Activated
WAG003288	Benzo(a)pyrene metabolism	9h	Non-Activated
WAG003083	COVID 19 adverse outcome pathway	9h	Non-Activated
WAG002750	Choline catabolism	9h	Active
WAG003044	FGF23 signaling in hypophosphatemic rickets and related disorders	9h	Non-Activated
WAG003257	Hypertrophy model	9h	Non-Activated
WAG003086	LDLRAD4 and what we know about it	9h	Non-Activated
WAG002936	LTF danger signal response pathway	9h	Non-Activated
WAG002625	MYD88 distinct input output pathway	9h	Non-Activated
WAG002591	Metallothioneins bind metals	9h	Active
WAG003134	NGF stimulated transcription	9h	Active
WAG002534	Photodynamic therapy induced unfolded protein response	9h	Active
WAG003284	Polyol pathway	9h	Active
WAG003213	Prostaglandin signaling	9h	Non-Activated
WAG003130	Response of EIF2AK1 (HRI) to heme deficiency	9h	Active
WAG002668	Robo4 and VEGF signaling pathways crosstalk	9h	Non-Activated
WAG002701	Selective serotonin reuptake inhibitors lead to several adverse outcomes	9h	Non-Activated
