# Supplementary material for: Temporal GeneTerrain: advancing precision medicine through dynamic gene expression visualization
Source: Front Bioinform. 2025 Jun 18;5:1602850. doi: 10.3389/fbinf.2025.1602850 (PMC12213653; doi:10.3389/fbinf.2025.1602850)
Supplement: Supplementary file 3 [file Table1.xlsx]

## Sheet: Comparison
Method	Core Concept	Temporal Integration	Network Context	Primary Visualization	Key Strengths
Temporal GeneTerrain	PPI‐derived 2D layout + Gaussian‐kernel signal fields	Stitched continuous terrains across time points	Explicit (PPI network layout)	Smooth “terrain” snapshots/animations	Integrates topology + expression; scales to ~1,000 genes without overcrowding; seamless pathway/enrichment overlays
TSEE	Extends Elastic Embedding by adding a temporal repulsive force between distinct time‐stage points	Penalizes placing latent points from different time stages too close, preserving temporal order	Implicit (none)	Low‐dimensional scatterplots	Preserves local, global & temporal structure; reveals continuous trajectories and oscillation patterns BioMed CentralPubMed
TrendCatcher	Smoothing‐spline ANOVA + break‐point detection to identify dynamic differentially expressed genes	Models gene‐level trajectories; detects early, transient, persistent patterns	Implicit (none)	Time‐heatmaps & LOESS curves	Robust DDEG identification; uncovered early/persistent neutrophil activation in severe COVID-19 JCI Insight
TS‐OCD	Constructs dynamic PPI snapshots; applies a time‐smooth overlapping complex detection model	Implicit via smoothness constraint between consecutive DPPI networks	Explicit (PPI per time point)	Static PPI snapshots with complex annotations	Detects stable & transient complexes; models module growth/shrinkage over time
DyNet	Synchronized multi‐state network comparison in Cytoscape	Discrete state graphs synchronized in layout	Implicit (shared reference layout)	Side‐by‐side Cytoscape network views	Real-time layout sync; ranks most rewired proteins
DyNetViewer	Builds dynamic networks by integrating static PPI + time‐course data in Cytoscape 3	Layers/time points as dynamic graph states	Explicit (integrated DPIN construction)	Animated Cytoscape network browser	Multiple DPIN options; topological variation analysis
TimeNexus	Temporal multilayer networks (each layer = a time point)	Each time point is a separate layer; supports inter‐ & intra‐layer edges	Explicit (multilayer network)	Layered network views with comparisons	Flexible tMLN creation; subnetwork extraction via PathLinker/ANAT
TVNViewer	Web‐based scrolling through network snapshots, highlighting rewired edges	Discrete snapshots navigable over time/space	Implicit (shadowed rewired edges)	Force‐directed/circular layouts in browser	Fast “time-scrubbing”; degree & descriptor analytics
NACEP	Dirichlet process clustering + co‐expression modules	Compares temporal patterns via module membership probabilities	Implicit (co‐expression modules)	Time‐heatmaps & trajectory plots	Robust to noise; leverages module uncertainty for sensitive pattern comparisons
TETRAMER	Reconstructs temporal GRNs; simulates transcriptional cascades to predict master TFs	Discrete temporal states + logical rules to propagate regulatory signals	Explicit (GRNs + TF–TG edges)	Directed GRN layouts with temporal annotations	Identifies master regulators; integrates diverse public GRN sources
BioTapestry	Hierarchical modeling of GRNs with multi‐level submodels	Static submodels for snapshots; layered views capture spatial/temporal context	Implicit (hierarchical GRNs)	Hierarchically organized network diagrams	Supports large developmental GRNs; web‐sharing of models

## Sheet: Sheet1
Method	Continuous Temporal Map	PPI Integration (Spatial)	Statistical DDEG Modeling	Regulatory GRN Modeling	Cytoscape Plugin
Temporal GeneTerrain	✔	✔	✖	✖	✖
TSEE	✔	✖	✖	✖	✖
TrendCatcher	✖	✖	✔	✖	✖
TS-OCD	✖	✔	✖	✖	✖
DyNet	✖	✔	✖	✖	✔
DyNetViewer	✖	✖	✖	✖	✔
TimeNexus	✖	✖	✖	✖	✔
TVNViewer	✖	✖	✖	✖	✔
NACEP	✖	✖	✔	✖	✖
TETRAMER	✖	✖	✖	✔	✖
BioTapestry	✖	✖	✖	✔	✖
